# Supplementary material for: Acoustic vortex tweezers selectively manipulated intelligent microbots to achieve in situ explosive antibody production for precise immunotherapy
Source: Research Square preprint supplement (doi:10.21203/rs.3.rs-7968444/v1), 2025-11-03
Supplement: Supplementary file 1 [file 1369fc7fbcf8662220090dc5.docx]

**Supplementary information**

**Acoustic vortex tweezers selectively manipulated intelligent microbots to achieve in situexplosiveantibody production for precise immunotherapy**

**Ya et al**

**Supplementary Figures**


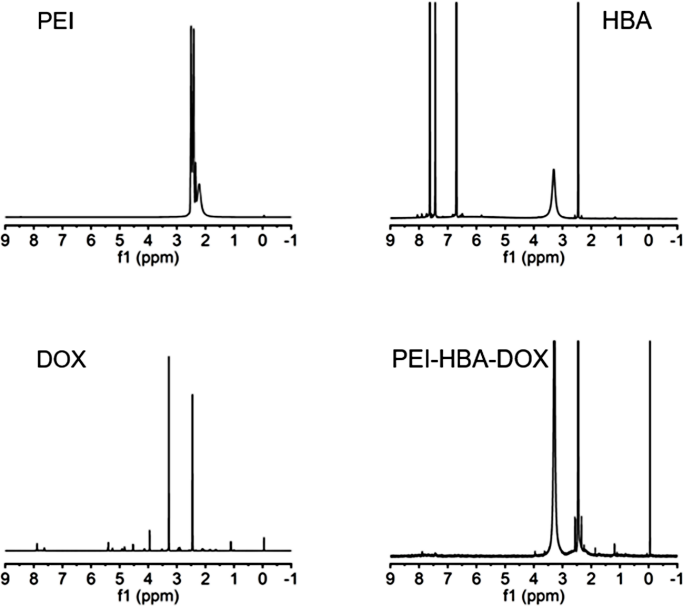


**Supplementary Figure 1.** 1HNMR spectra of PEI, HBA, DOX and PEI-HBA-DOX.


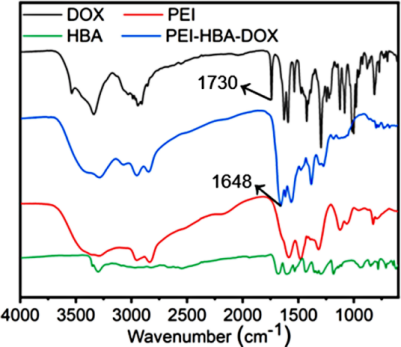


**Supplementary Figure 2.** FITR spectra of HBA, DOX, PEI, and PEI-HBA-DOX.


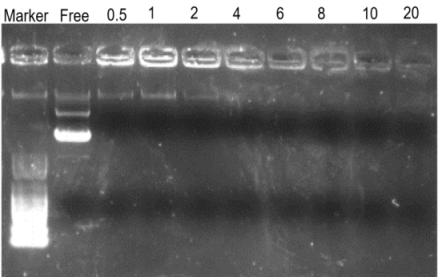


**Supplementary Figure 3.** Agarose gel electrophoresis analysis.


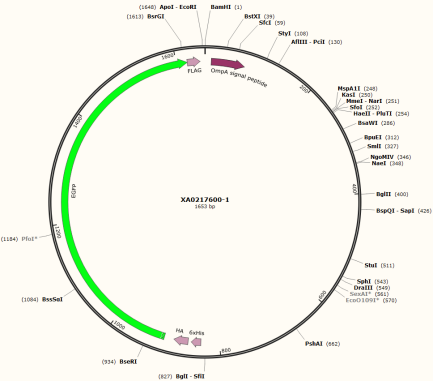


**Supplementary Figure 4.** The map of plasmid sequence.


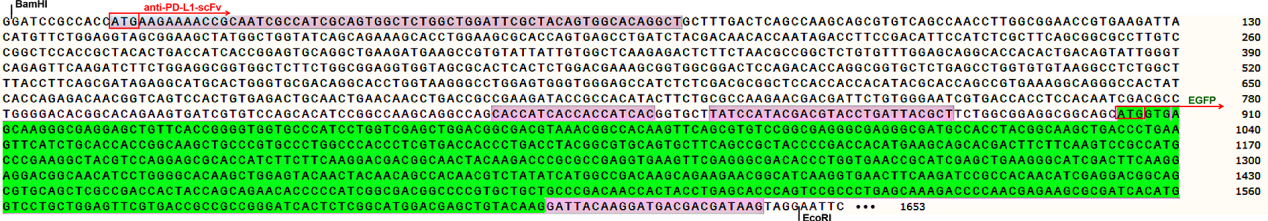


**Supplementary Figure 5.** The sequence of plasmid that conjugating anti-PD-L1-scFv with EGFP. The original sequence of anti-PD-L1-scFv was obtained from the previous study [x].


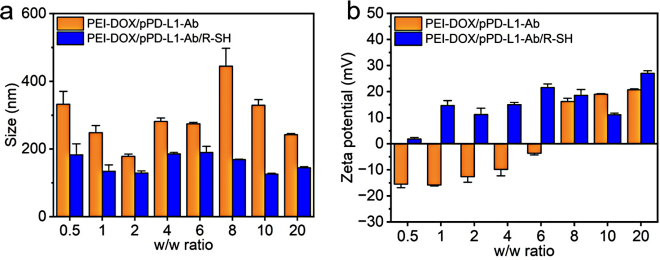


**Supplementary Figure 6.** Size distribution and Zeta potential of polyplex in different w/w ratio.


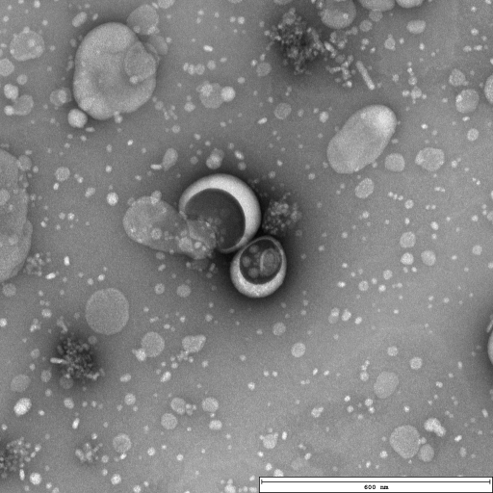


**Supplementary Figure 7.** TEM image of CD/pAb@Lip.


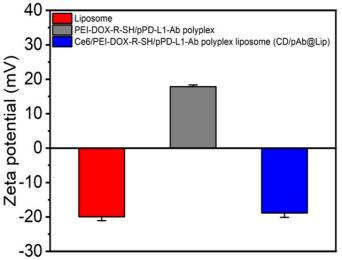


**Supplementary Figure 8.** Zeta potential of different particles.


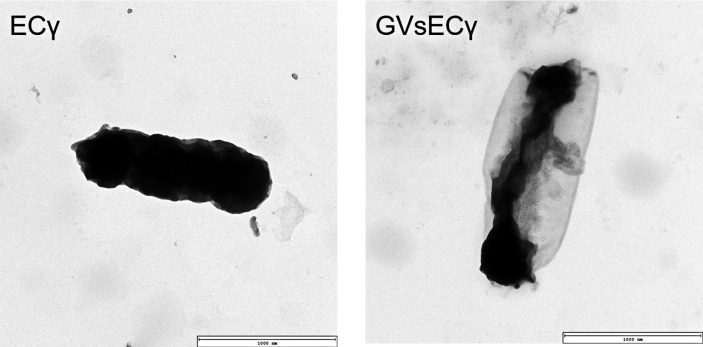


**Supplementary Figure 9.** TEM image of ECγ and GVsECγ.


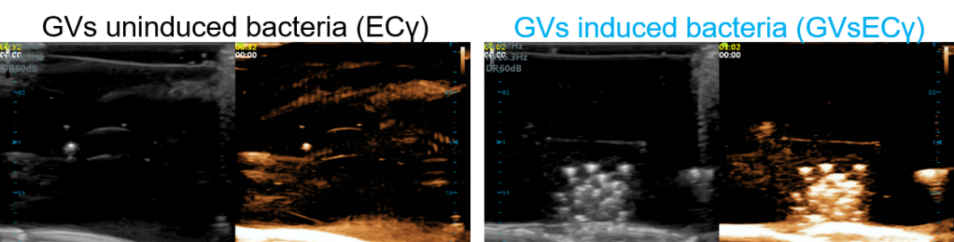


**Supplementary Figure 10.** Ultrasonic images of ECγ and GVsECγ


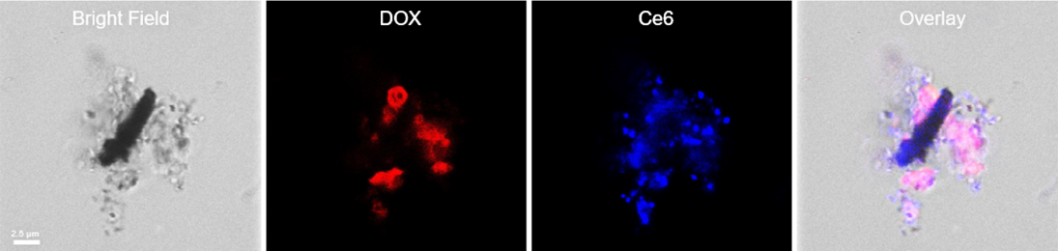


**Supplementary Figure 11.** Fluorescent image of CD/pAb@Lip@GVsECγ.


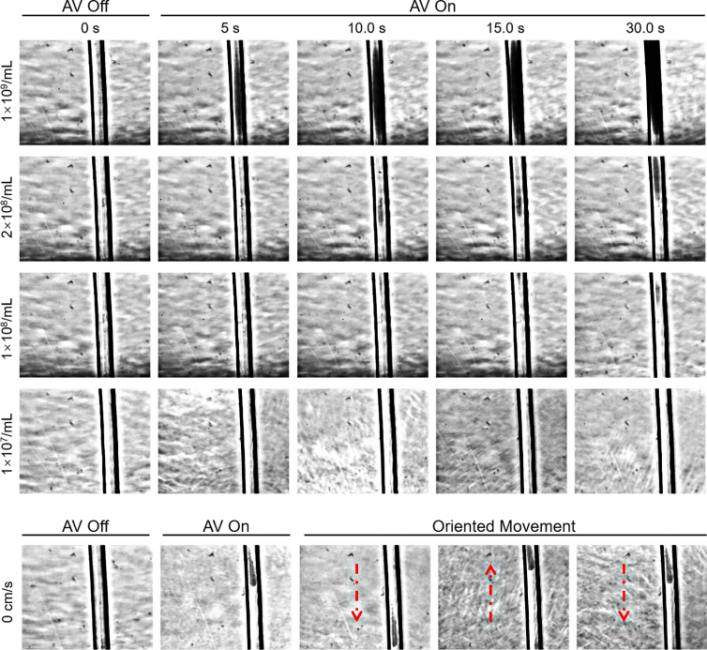


**Supplementary Figure 12.** In vitro AV manipulation of CD/pAb@Lip@GVsECγ in different concentration.


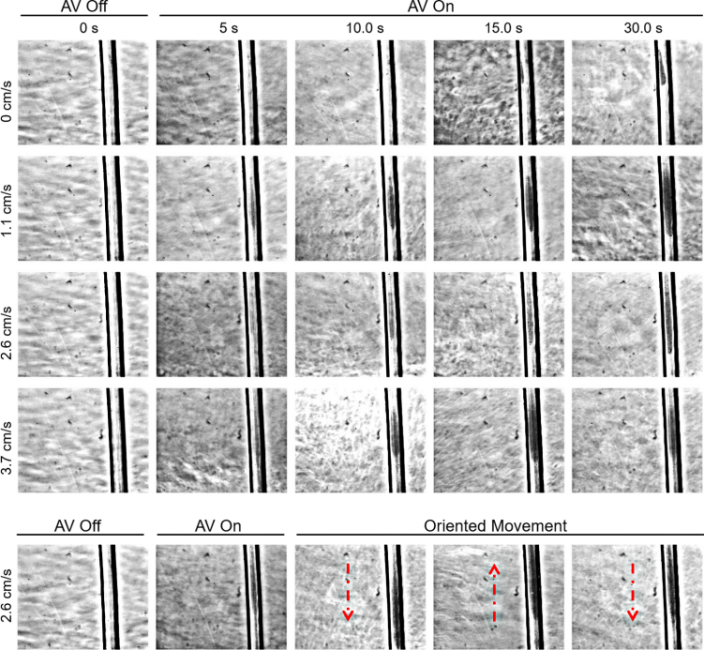


**Supplementary Figure 13.** In vitro AV manipulation of CD/pAb@Lip@GVsECγ in different flow velocity.


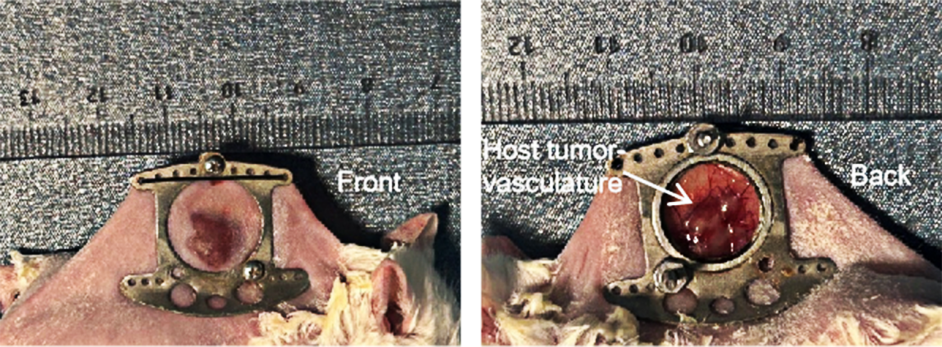


**Supplementary Figure 14.** Establish of tumor window chamber model.


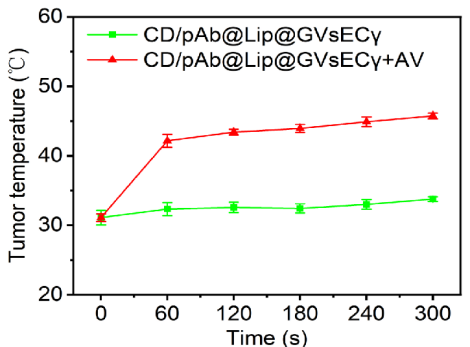


**Supplementary Figure 15.** Temperature change of tumor during AV irradiation.


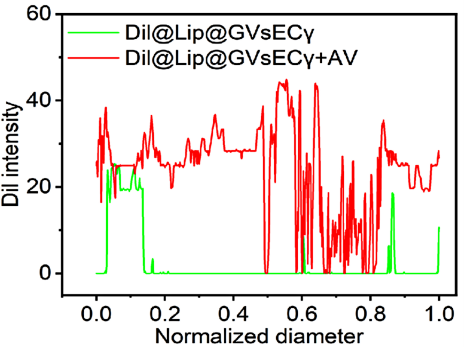


**Supplementary Figure 16.** Fluorescence intensity analysis of tumor section after AV irradiation.


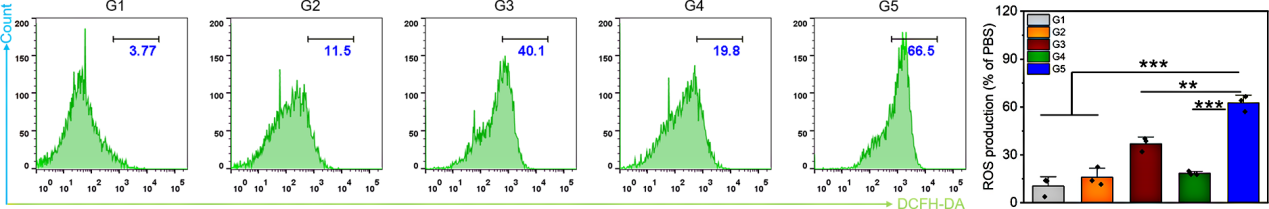


**Supplementary Figure 17.** ROS detection in different groups at celluar level. Noted: G1: PBS, G2: FAV, G3: CD@Lip@GVsECγ + AV, G4: CD/pAb@Lip@GVsECγ, G5: CD/pAb@Lip@GVsECγ + AV.


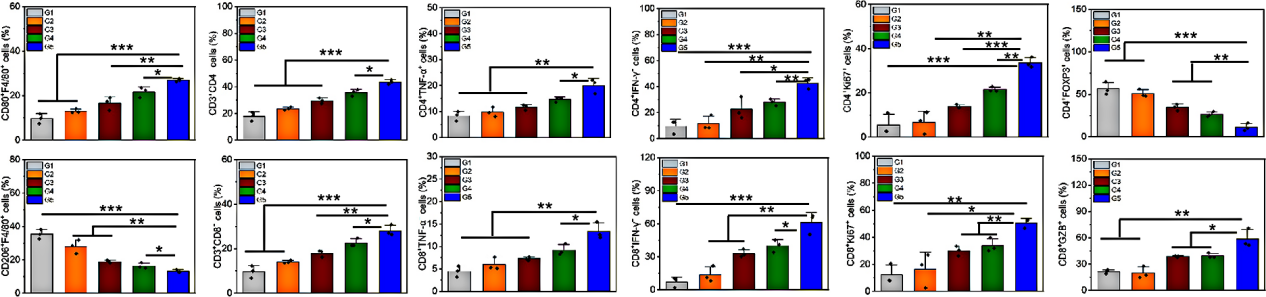


**Supplementary Figure 18.** Quantitative analysis of immune cell infiltration in primary tumor. Noted: G1: PBS, G2: FAV, G3: CD@Lip@GVsECγ + AV, G4: CD/pAb@Lip@GVsECγ, G5: CD/pAb@Lip@GVsECγ + AV.


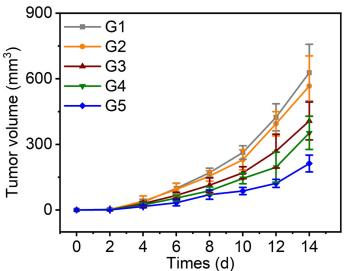


**Supplementary Figure 19.** Distant tumor growth in different groups within 14 days. Noted: G1: PBS, G2: FAV, G3: CD@Lip@GVsECγ + AV, G4: CD/pAb@Lip@GVsECγ, G5: CD/pAb@Lip@GVsECγ + AV.


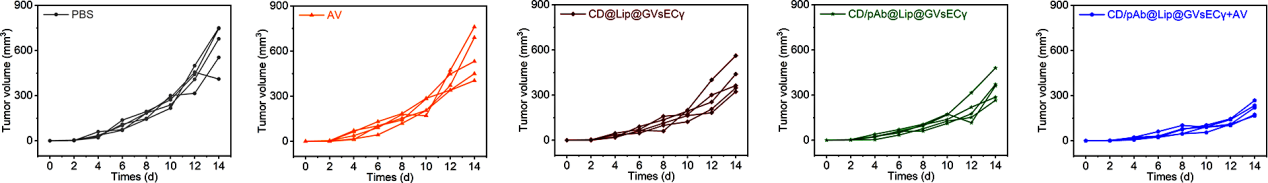


**Supplementary Figure 20.** Individual distant tumor growth in different groups within 14 days.


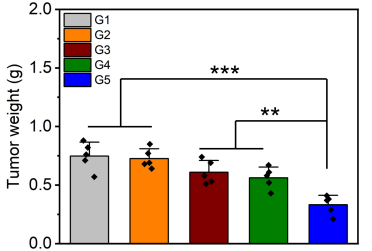


**Supplementary Figure 21.** In vitro tumor weighing in different groups after treatments. Noted: G1: PBS, G2: FAV, G3: CD@Lip@GVsECγ + AV, G4: CD/pAb@Lip@GVsECγ, G5: CD/pAb@Lip@GVsECγ + AV.


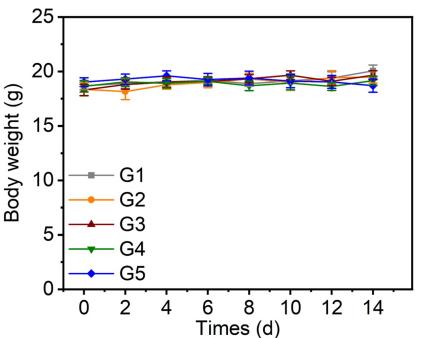


**Supplementary Figure 22** Body weight change in different groups within 14 days. Noted: G1: PBS, G2: FAV, G3: CD@Lip@GVsECγ + AV, G4: CD/pAb@Lip@GVsECγ, G5: CD/pAb@Lip@GVsECγ + AV.


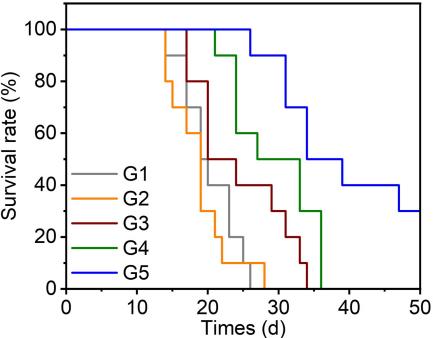


**Supplementary Figure 23.** Survival rate of mice in different groups within 50 days. Noted: G1: PBS, G2: FAV, G3: CD@Lip@GVsECγ + AV, G4: CD/pAb@Lip@GVsECγ, G5: CD/pAb@Lip@GVsECγ + AV.


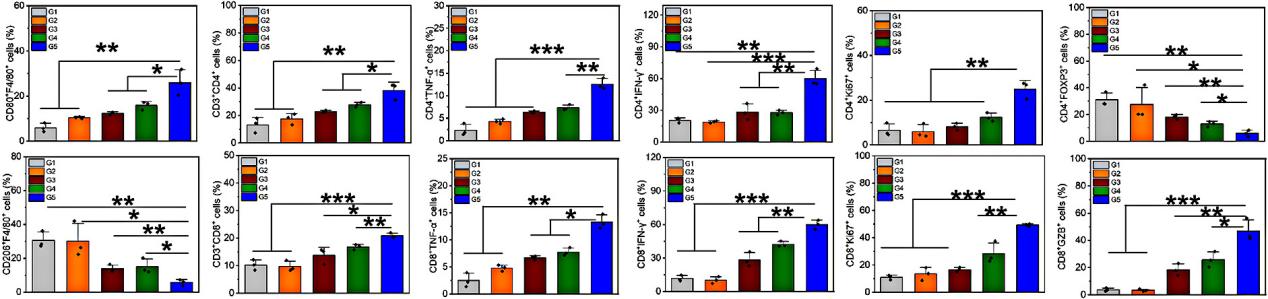


**Supplementary Figure 24.** Quantitative analysis of immune cell infiltration in distant tumor. Noted: G1: PBS, G2: FAV, G3: CD@Lip@GVsECγ + AV, G4: CD/pAb@Lip@GVsECγ, G5: CD/pAb@Lip@GVsECγ + AV.
